# Supplementary material for: Gaining more from doing less? The effects of a one-week deload period during supervised resistance training on muscular adaptations
Source: PeerJ journal article supplement (doi:10.7717/peerj.16777), 2024-01-22
Supplement: ReadinessQuestionnaire.pdf [file ReadinessQuestionnaire.pdf]

## Answers to readiness-to-train (RTQ) question

The questionnaire consists of seven questions with responses made from bipolar scales ranging from 1 to 4, 1 to 5 and 1 to 10.

**1** can be described as not at all/extremely low and **4, 5, 10** (depending on lower/upper end of the scale) can be described as extreme amount/extremely high.

|                                                                        |   |   |   |   |   |
|------------------------------------------------------------------------|---|---|---|---|---|
| Q1: Do you feel physically strong today? (1-5)                         | 1 | 2 | 3 | 4 | 5 |
| Q2: Do you feel mentally strong today? (1-5)                           | 1 | 2 | 3 | 4 | 5 |
| Q3: How would you describe your health today? (1-4)                    | 1 | 2 | 3 | 4 |   |
| Q4: How would you describe your appetite over the past 24h? (1-5)      | 1 | 2 | 3 | 4 | 5 |
| Q5: How would you describe your sleep quality over the past 24h? (1-4) | 1 | 2 | 3 | 4 |   |

|                                                   |   |   |   |   |   |   |   |   |   |    |
|---------------------------------------------------|---|---|---|---|---|---|---|---|---|----|
| Q6: Do you have any muscle soreness today? (1-10) | 1 | 2 | 3 | 4 | 5 | 6 | 7 | 8 | 9 | 10 |
| Q7: Rate your motivation to train today (1-10)    | 1 | 2 | 3 | 4 | 5 | 6 | 7 | 8 | 9 | 10 |
