# Supplementary material for: Gaining more from doing less? The effects of a one-week deload period during supervised resistance training on muscular adaptations
Source: PeerJ journal article supplement (doi:10.7717/peerj.16777), 2024-01-22
Supplement: WAMBSChecklist.pdf [file WAMBSChecklist.pdf]

# Supplementary File

The following supplementary file provides additional analyses and presents the WAMBS (When to worry, and how to Avoid the Misuse of Bayesian Statistics) checklist as a diagnostic tool that was used to assess prior distributions, the estimation process, and the influence of priors for analysis of body composition and performance outcomes <sup>[1]</sup>. The following provides details of the WAMBS checklist and how it was used.

| <b>THE WAMBS-CHECKLIST</b><br><b><u>When to worry, and how to Avoid the Misuse of Bayesian Statistics</u></b><br><i>DEPAOLI &amp; VAN DE SCHOOT (2016)</i>                                                           |                                                                                                                                                                                                                                                                                                                                                                                                                                                                                                                                                                                                                                       |
|----------------------------------------------------------------------------------------------------------------------------------------------------------------------------------------------------------------------|---------------------------------------------------------------------------------------------------------------------------------------------------------------------------------------------------------------------------------------------------------------------------------------------------------------------------------------------------------------------------------------------------------------------------------------------------------------------------------------------------------------------------------------------------------------------------------------------------------------------------------------|
| <b>TO BE CHECKED BEFORE ESTIMATING</b>                                                                                                                                                                               |                                                                                                                                                                                                                                                                                                                                                                                                                                                                                                                                                                                                                                       |
| <b>Point 1:</b> Do you understand the priors?                                                                                                                                                                        | Analyses were conducted using ANCOVAs with the pre-intervention value centered. The intercept therefore represents the post-intervention value. Informative priors from S&C research were used to identify the post value based on typical change from pre-intervention <sup>[2]</sup> . Values were obtained on the original scale by multiplying by the pooled pre-intervention standard deviation. For the group effect, informative priors were centered on zero, with the standard deviation based on variation observed in comparative research in S&C <sup>[3]</sup> . Actual prior distributions are provided for each model. |
| <b>TO BE CHECKED AFTER ESTIMATION</b>                                                                                                                                                                                |                                                                                                                                                                                                                                                                                                                                                                                                                                                                                                                                                                                                                                       |
| <b>Point 2:</b> Does the trace-plot exhibit convergence?                                                                                                                                                             | Trace-plots were examined and all Rhat values were reported.                                                                                                                                                                                                                                                                                                                                                                                                                                                                                                                                                                          |
| <b>Point 3:</b> Does convergence remain after doubling the number of iterations?                                                                                                                                     | Trace-plots were examined and bias for group parameter presented as a percentage $100 * (\text{original} - \text{doubling}) / \text{original}$ reported.                                                                                                                                                                                                                                                                                                                                                                                                                                                                              |
| <b>Point 4:</b> Does the histogram have enough information?                                                                                                                                                          | Plot of histogram for all parameters presented.                                                                                                                                                                                                                                                                                                                                                                                                                                                                                                                                                                                       |
| <b>Point 5:</b> Do chains exhibit autocorrelation?                                                                                                                                                                   | Plot of autocorrelation for all parameters presented.                                                                                                                                                                                                                                                                                                                                                                                                                                                                                                                                                                                 |
| <b>Point 6:</b> Do posterior distributions make sense?                                                                                                                                                               | In all cases yes                                                                                                                                                                                                                                                                                                                                                                                                                                                                                                                                                                                                                      |
| <b>UNDERSTANDING INFLUENCE OF PRIORS</b>                                                                                                                                                                             |                                                                                                                                                                                                                                                                                                                                                                                                                                                                                                                                                                                                                                       |
| <b>Point 7:</b> Do different variance priors influence the results?                                                                                                                                                  | Sigma was modeled using weakly-informative Half-t distributions with 3df. As a check, informative gamma priors with shape k based on outcome and scale $\theta$ set to 1. Bias in group parameter was presented.                                                                                                                                                                                                                                                                                                                                                                                                                      |
| <b>Point 8:</b> Is there a notable effect of the prior when compared with non-informative priors?                                                                                                                    | As a check, models were conducted with all default weakly-informative priors and bias in group parameter presented.                                                                                                                                                                                                                                                                                                                                                                                                                                                                                                                   |
| <b>Point 9:</b> Are the results stable from a sensitivity analysis?                                                                                                                                                  | Checked in each case, use of informative priors tended to reduce point estimate and tails of group parameter.                                                                                                                                                                                                                                                                                                                                                                                                                                                                                                                         |
| <b>AFTER INTERPRETATION OF RESULTS</b>                                                                                                                                                                               |                                                                                                                                                                                                                                                                                                                                                                                                                                                                                                                                                                                                                                       |
| <b>Point 10:</b> Is the Bayesian way of interpreting and reporting model results used? <i>(a) Also report on: missing data, model fit and comparison, non-response, generalizability, ability to replicate, etc.</i> | Reporting of results combining in-text and supplementary file was done in a comprehensive and systematic manner, focussing on the group difference parameter and the magnitude relative to thresholds specific to S&C. Posterior probabilities were also used to summarize likely differences between groups.                                                                                                                                                                                                                                                                                                                         |

## References

1. Depaoli S, van de Schoot R. Improving transparency and replication in bayesian statistics: The WAMBS-checklist. Psychol Methods. 2017 June 01;22(2):240-61.
2. Swinton PA, Burgess K, Hall A, Greig L, Psyllas J, Aspe R, et al. Interpreting magnitude of change in strength and conditioning: Effect size selection, threshold values and bayesian updating. J Sports Sci. 2022 September 01;40(18):2047-54.
3. Swinton PA, Murphy A. Comparative effect size distributions in strength and conditioning and implications for future research: A meta-analysis. SportRxiv. 2022:DOI: 10.51224/SRXIV.202.

# Body composition

## Muscle thickness

### 1) Rectus femoris

Measurements were obtained at 30%, 50% and 70% between the lateral condyle of the femur and greater trochanter.

Individual data points

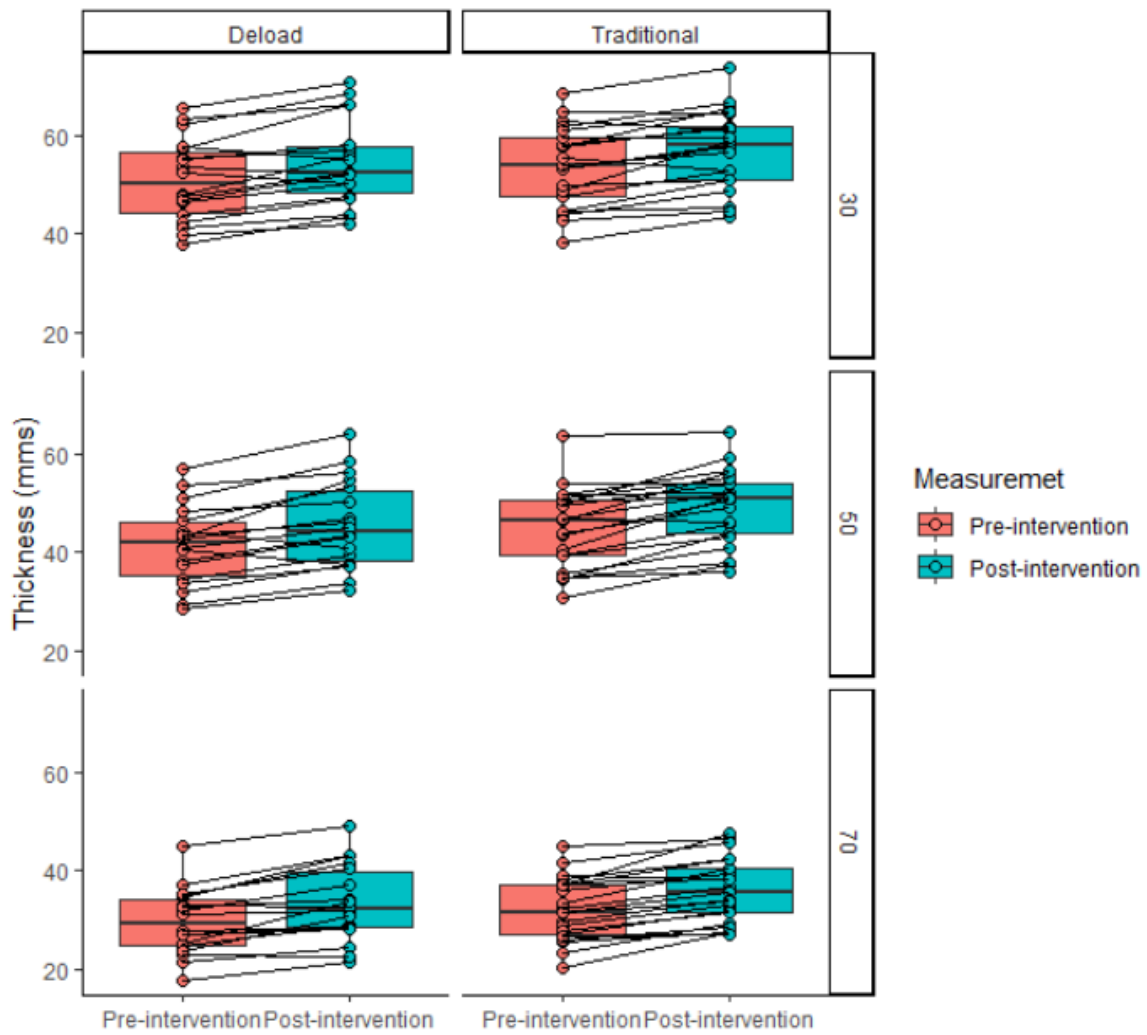

# WAMBS: Univariate rectus femoris thickness (30/50/70)

## Understanding priors

| Outcome                | Rectus femoris 30%                                                                | Rectus femoris 50%                                                                 | Rectus femoris 70%                                                                  |
|------------------------|-----------------------------------------------------------------------------------|------------------------------------------------------------------------------------|-------------------------------------------------------------------------------------|
| Intercept              | Normal(56.0,3.6 <sup>2</sup> )                                                    | Normal(46.7,3.6 <sup>2</sup> )                                                     | Normal(33.8,3.6 <sup>2</sup> )                                                      |
| Centered Pre Value     | Normal(0.85,2.0 <sup>2</sup> )                                                    | Normal(0.85,2.0 <sup>2</sup> )                                                     | Normal(0.85,2.9 <sup>2</sup> )                                                      |
| Group                  | Normal(0,3.6 <sup>2</sup> )                                                       | Normal(0,3.6 <sup>2</sup> )                                                        | Normal(0,3.6 <sup>2</sup> )                                                         |
| Prior predictive check | 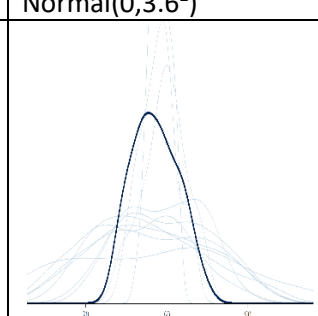 |  |  |

## Estimation

| Outcome                          | Rectus femoris 30%                                                                  | Rectus femoris 50%                                                                   | Rectus femoris 70%                                                                    |
|----------------------------------|-------------------------------------------------------------------------------------|--------------------------------------------------------------------------------------|---------------------------------------------------------------------------------------|
| Rhat values                      | All equal 1.0                                                                       | All equal 1.0                                                                        | All equal 1.0                                                                         |
| Bias doubling iterations (Group) | 1.7%                                                                                | -1.6%                                                                                | 5.5%                                                                                  |
| Posterior predictive check       | 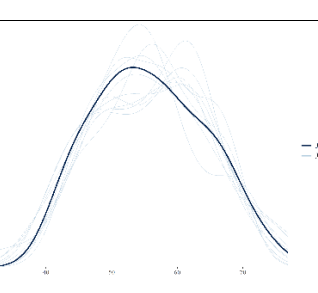  |   |   |
| Histogram and correlation        |  |  |  |
| Autocorrelation                  |  |  |  |

## Influence of priors

| Outcome                                       | Rectus femoris 30% | Rectus femoris 50%  | Rectus femoris 70%  |
|-----------------------------------------------|--------------------|---------------------|---------------------|
| Bias different specification variance (Group) | Gamma(3,1)<br>8.1% | Gamma(3,1)<br>-3.5% | Gamma(3,1)<br>-1.7% |
| Bias after non-informative priors (Group)     | -4.1%              | -11.1%              | -24.7%              |

2) Vastus lateralis

Measurements were obtained at 30%, 50% and 70% between the lateral condyle of the femur and greater trochanter.

Individual data points

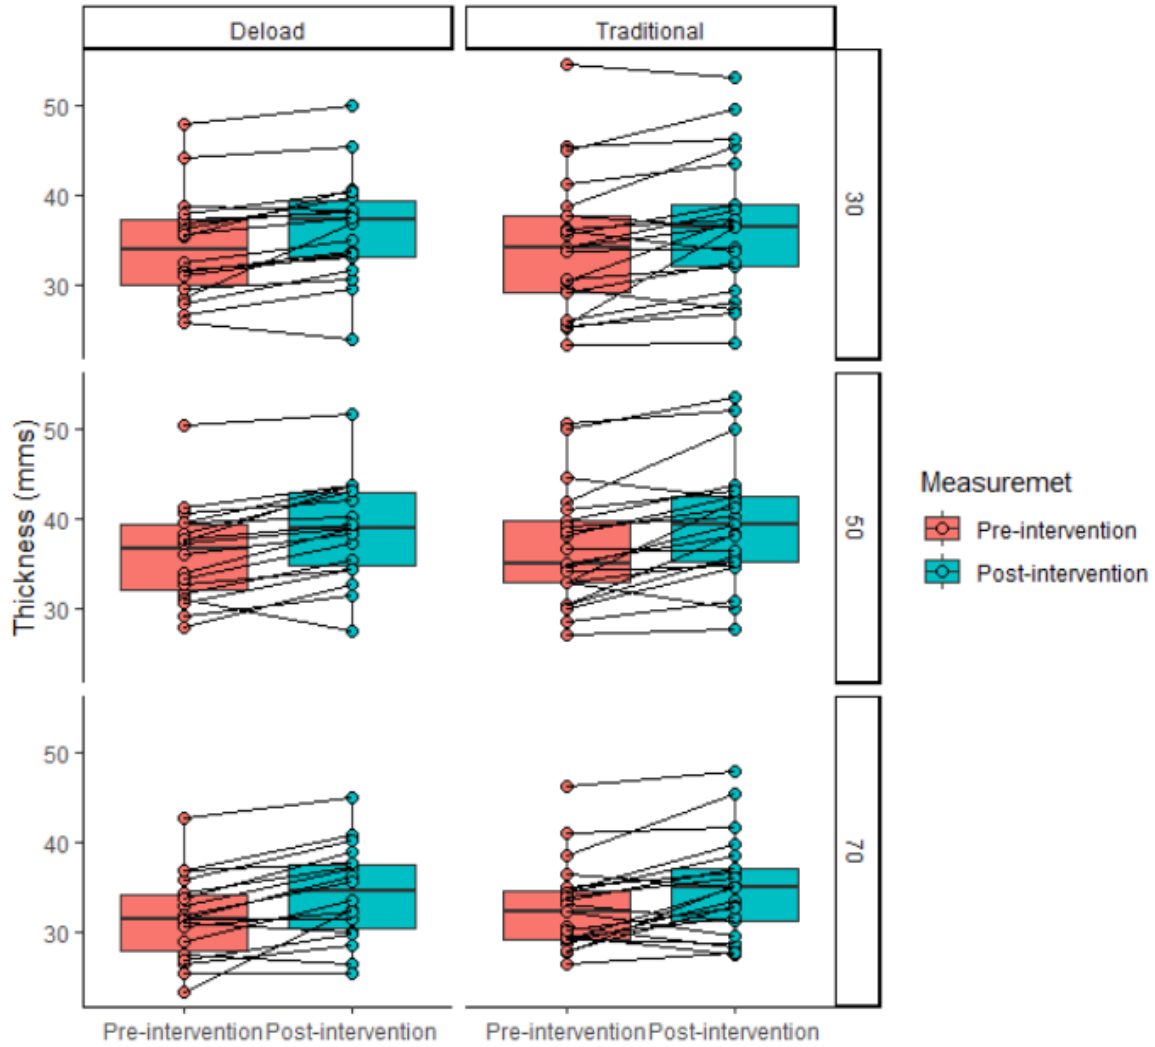

# WAMBS: Vastus lateralis thickness (30/50/70)

## Understanding priors

| Outcome                | Vastus lateralis 30%                                                              | Vastus lateralis 50%                                                               | Vastus lateralis 70%                                                                |
|------------------------|-----------------------------------------------------------------------------------|------------------------------------------------------------------------------------|-------------------------------------------------------------------------------------|
| Intercept              | Normal(37.3,0,3.1 <sup>2</sup> )                                                  | Normal(38.9,2.6 <sup>2</sup> )                                                     | Normal(34.3,2.1 <sup>2</sup> )                                                      |
| Centered Pre Value     | Normal(0.85,2.0 <sup>2</sup> )                                                    | Normal(0.85,2.0 <sup>2</sup> )                                                     | Normal(0.85,2.9 <sup>2</sup> )                                                      |
| Group                  | Normal(0,2.8 <sup>2</sup> )                                                       | Normal(0,2.4 <sup>2</sup> )                                                        | Normal(0,1.9 <sup>2</sup> )                                                         |
| Prior predictive check | 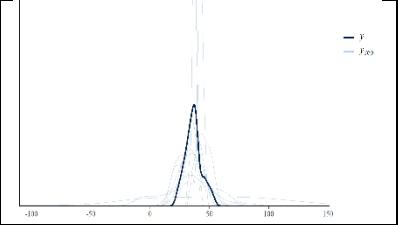 |  |  |

## Estimation

| Outcome                          | Vastus lateralis 30%                                                                | Vastus lateralis 50%                                                                 | Vastus lateralis 70%                                                                  |
|----------------------------------|-------------------------------------------------------------------------------------|--------------------------------------------------------------------------------------|---------------------------------------------------------------------------------------|
| Rhat values                      | All equal 1.0                                                                       | All equal 1.0                                                                        | All equal 1.0                                                                         |
| Bias doubling iterations (Group) | -11.6%                                                                              | -1.6%                                                                                | -1.0%                                                                                 |
| Posterior predictive check       | 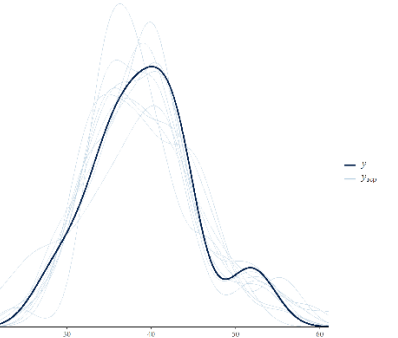  |   |   |
| Histogram and correlation        |  |  |  |
| Autocorrelation                  |  |  |  |

## Influence of priors

| Outcome                                       | Vastus lateralis 30% | Vastus lateralis 50% | Vastus lateralis 70% |
|-----------------------------------------------|----------------------|----------------------|----------------------|
| Bias different specification variance (Group) | Gamma(3,1)<br>-4.7%  | Gamma(3,1)<br>2.3%   | Gamma(3,1)<br>-1.7%  |

|                                           |       |        |       |
|-------------------------------------------|-------|--------|-------|
| Bias after non-informative priors (Group) | -9.8% | -16.8% | -3.7% |
|-------------------------------------------|-------|--------|-------|

3) Calf thickness

Outcomes included thickness of the lateral gastrocnemius, medial gastrocnemius, and soleus. Measurements were taken on the posterior surface of both legs at 25% of the lower leg length (the distance from the articular cleft between the femur and tibia condyles to the lateral malleolus).

Individual data points

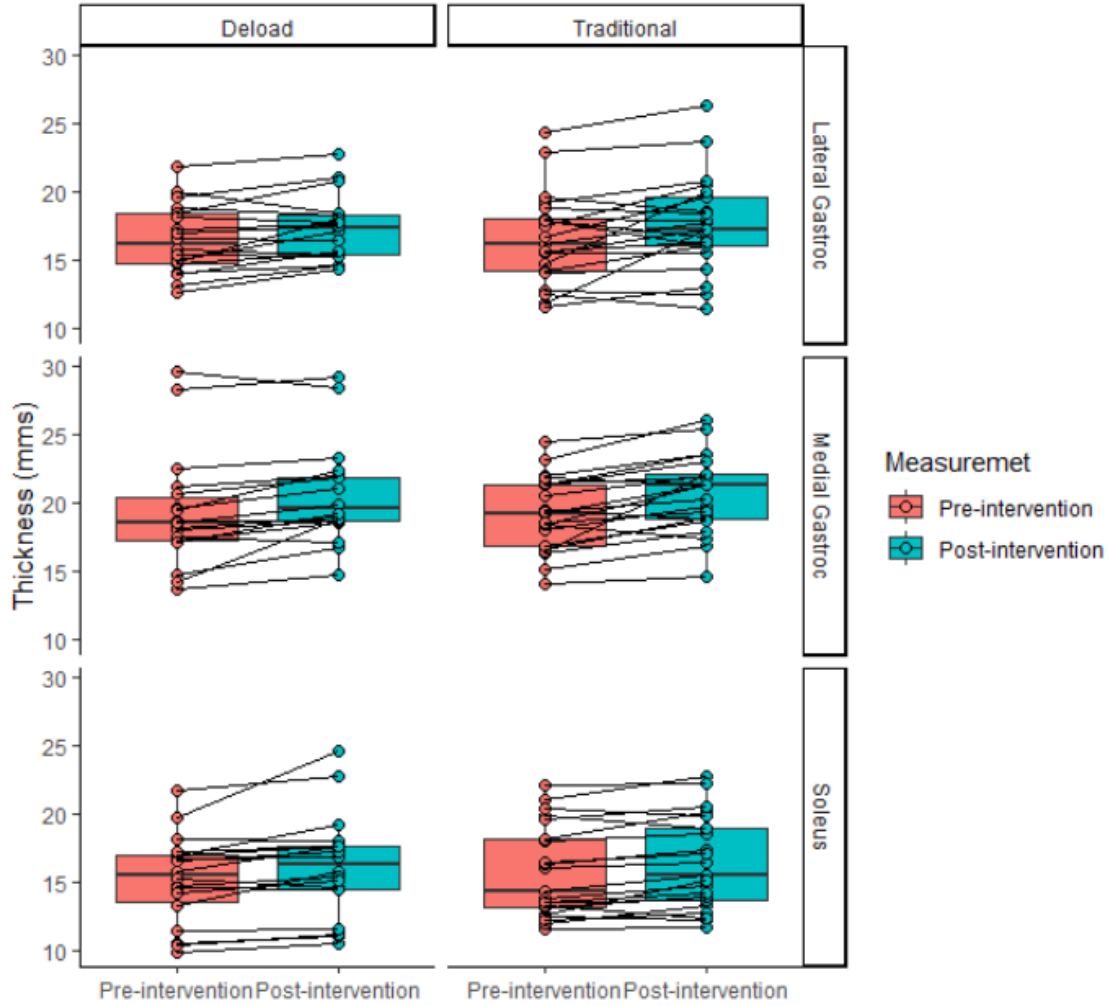

# WAMBS: lateral gastrocnemius, medial gastrocnemius, soleus

## Understanding priors

| Outcome                | Lateral gastrocnemius                                                             | Medial gastrocnemius                                                               | Soleus                                                                              |
|------------------------|-----------------------------------------------------------------------------------|------------------------------------------------------------------------------------|-------------------------------------------------------------------------------------|
| Intercept              | Normal(20.7,1.5 <sup>2</sup> )                                                    | Normal(17.8,1.3 <sup>2</sup> )                                                     | Normal(16.9,1.4 <sup>2</sup> )                                                      |
| Centered Pre Value     | Normal(0.85,2.0 <sup>2</sup> )                                                    | Normal(0.85,2.0 <sup>2</sup> )                                                     | Normal(0.85,2.9 <sup>2</sup> )                                                      |
| Group                  | Normal(0,1.3 <sup>2</sup> )                                                       | Normal(0,1.1 <sup>2</sup> )                                                        | Normal(0,1.3 <sup>2</sup> )                                                         |
| Prior predictive check | 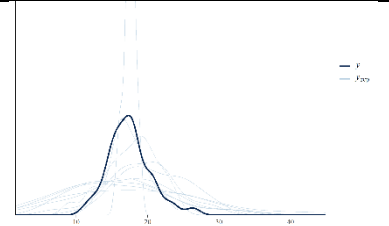 |  |  |

## Estimation

| Outcome                          | Lateral gastrocnemius                                                               | Medial gastrocnemius                                                                 | Soleus                                                                                |
|----------------------------------|-------------------------------------------------------------------------------------|--------------------------------------------------------------------------------------|---------------------------------------------------------------------------------------|
| Rhat values                      | All equal 1.0                                                                       | All equal 1.0                                                                        | All equal 1.0                                                                         |
| Bias doubling iterations (Group) | -4.2%                                                                               | 3.4%                                                                                 | 2.0%                                                                                  |
| Posterior predictive check       | 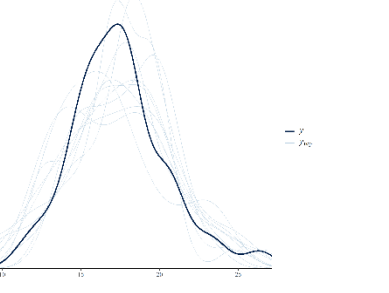  |   |   |
| Histogram and correlation        |  |  |  |
| Autocorrelation                  |  |  |  |

## Influence of priors

| Outcome                                       | Lateral gastrocnemius | Medial gastrocnemius | Soleus             |
|-----------------------------------------------|-----------------------|----------------------|--------------------|
| Bias different specification variance (Group) | Gamma(1,1)<br>-4.3%   | Gamma(1,1)<br>4.5%   | Gamma(1,1)<br>2.2% |

|                                           |        |       |       |
|-------------------------------------------|--------|-------|-------|
| Bias after non-informative priors (Group) | -22.5% | -7.2% | -3.8% |
|-------------------------------------------|--------|-------|-------|

### Body fat and lean mass

#### 4) Lower body lean mass and body fat percentage

Lower body lean mass and body fat percentage were obtained by multifrequency bioelectrical impedance analysis.

Individual data points

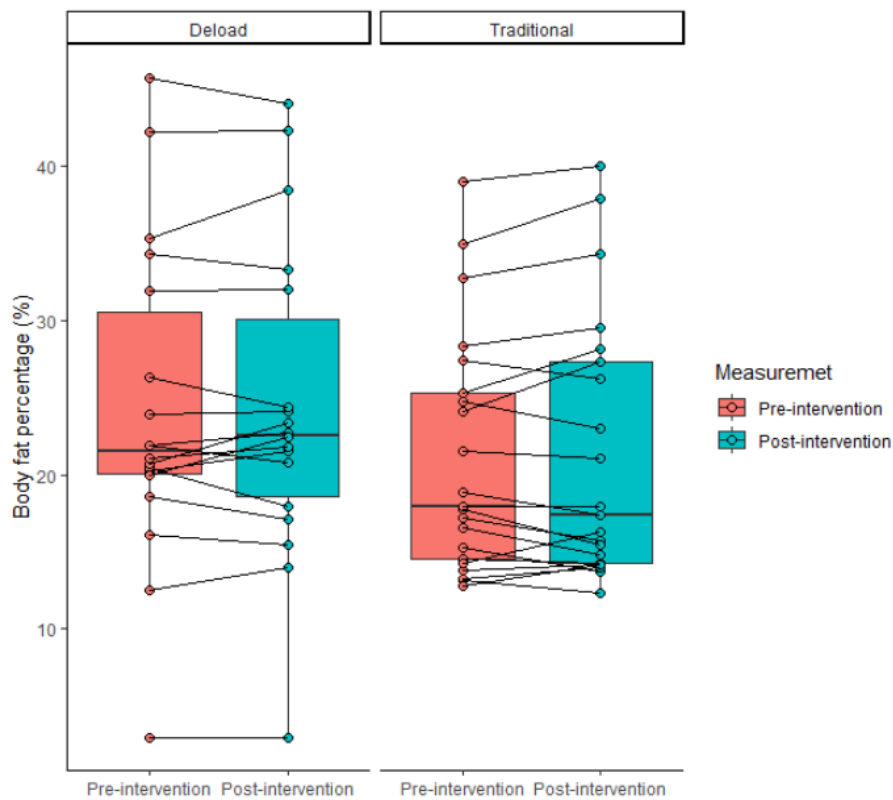



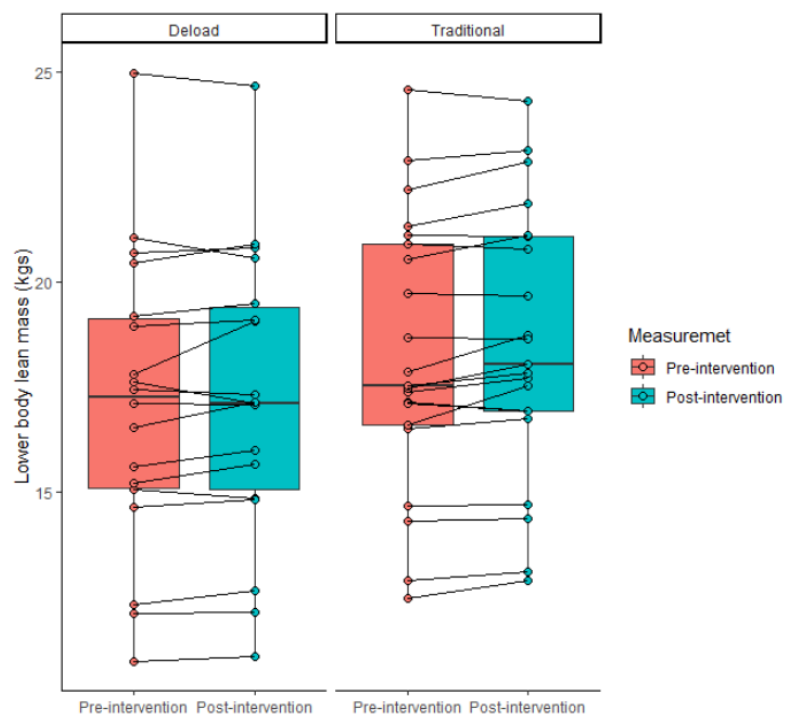

# WAMBS: Body fat percentage and lower body lean mass

## Understanding priors

|                        |                                                                                   |                                                                                    |
|------------------------|-----------------------------------------------------------------------------------|------------------------------------------------------------------------------------|
| Outcome                | Body fat %                                                                        | Lower body lean mass                                                               |
| Intercept              | Normal(26.6,4.0 <sup>2</sup> )                                                    | Normal(42.7,3.3 <sup>2</sup> )                                                     |
| Centered Pre Value     | Normal(0.85,2.0 <sup>2</sup> )                                                    | Normal(0.85,2.0 <sup>2</sup> )                                                     |
| Group                  | Normal(0,3.5 <sup>2</sup> )                                                       | Normal(0,2.9 <sup>2</sup> )                                                        |
| Prior predictive check | 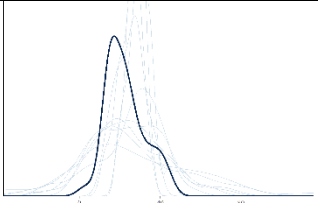 |  |

## Estimation

|                                  |                                                                                     |                                                                                      |
|----------------------------------|-------------------------------------------------------------------------------------|--------------------------------------------------------------------------------------|
| Outcome                          | Body fat %                                                                          | Lower body lean mass                                                                 |
| Rhat values                      | All equal 1.0                                                                       | All equal 1.0                                                                        |
| Bias doubling iterations (Group) | -4.2%                                                                               | -15.7%                                                                               |
| Posterior predictive check       | 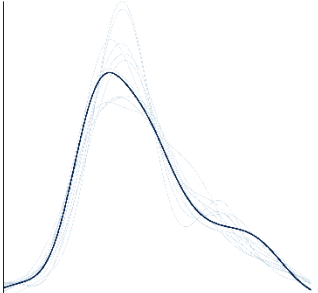  |   |
| Histogram and correlation        |  |  |
| Autocorrelation                  |  |  |

## Influence of priors

|                                               |                     |                      |
|-----------------------------------------------|---------------------|----------------------|
| Outcome                                       | Body fat %          | Lower body lean mass |
| Bias different specification variance (Group) | Gamma(1,1)<br>-6.3% | Gamma(1,1)<br>4.5%   |

|                                           |        |       |
|-------------------------------------------|--------|-------|
| Bias after non-informative priors (Group) | -19.9% | -7.2% |
|-------------------------------------------|--------|-------|

### Body composition within group effect size summary

Bayesian standardized mean difference effect sizes were estimated accounting for uncertainty in mean change for each group and pre-intervention standard deviation.

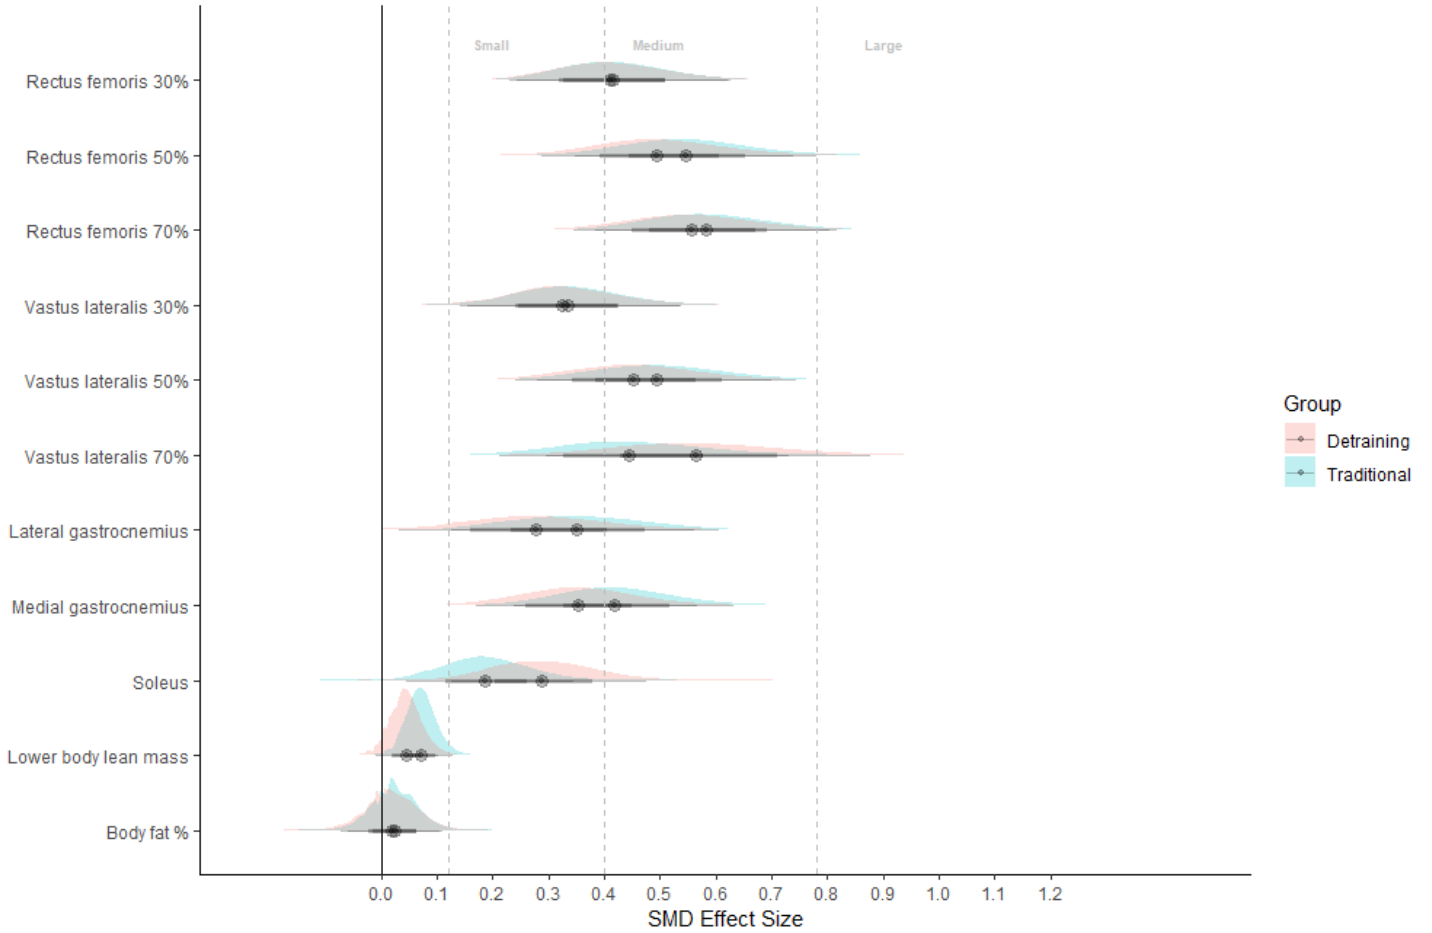

Small (0.12), medium (0.40) and large (0.78) thresholds derived for strength and conditioning interventions are presented with gray lines.

# Performance

## Strength

### 1) Isometric and dynamic strength

Isometric strength assessment was carried out using dynamometry testing with the participant seated and performing unilateral isometric actions of the knee extensors of the dominant limb. Dynamic lower body strength was assessed by 1RM testing in the back squat exercise performed on a Smith machine.

### Individual data points

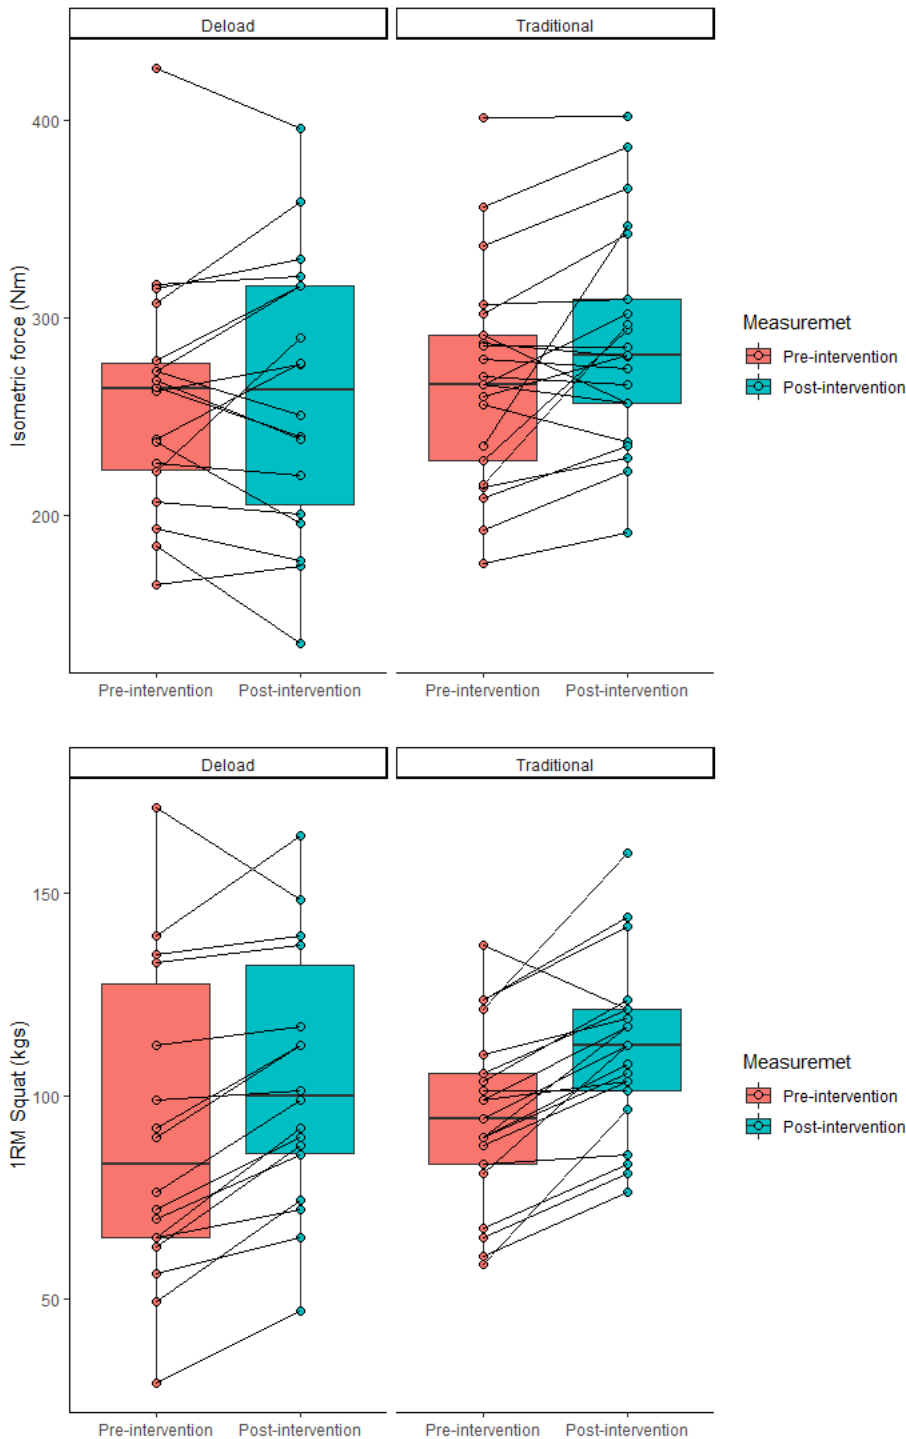

# WAMBS: Isometric and dynamic strength

## Understanding priors

| Outcome                | Isometric strength                                                                | Dynamic strength                                                                   |
|------------------------|-----------------------------------------------------------------------------------|------------------------------------------------------------------------------------|
| Intercept              | Normal(289.0,25.1 <sup>2</sup> )                                                  | Normal(237.0,29.3 <sup>2</sup> )                                                   |
| Centered Pre Value     | Normal(0.85,2.0 <sup>2</sup> )                                                    | Normal(0.85,2.0 <sup>2</sup> )                                                     |
| Group                  | Normal(0,22.8 <sup>2</sup> )                                                      | Normal(0,26.6 <sup>2</sup> )                                                       |
| Prior predictive check | 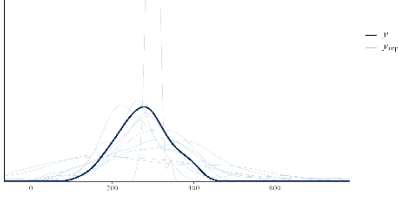 |  |

## Estimation

| Outcome                          | Isometric strength                                                                  | Dynamic strength                                                                     |
|----------------------------------|-------------------------------------------------------------------------------------|--------------------------------------------------------------------------------------|
| Rhat values                      | All equal 1.0                                                                       | All equal 1.0                                                                        |
| Bias doubling iterations (Group) | -1.8%                                                                               | -1.4%                                                                                |
| Posterior predictive check       | 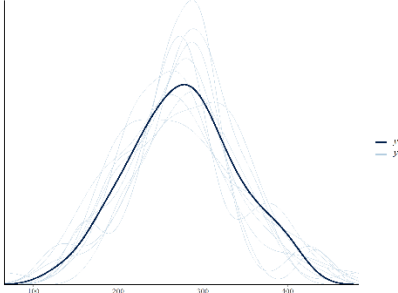  |   |
| Histogram and correlation        |  |  |
| Autocorrelation                  |  |  |

## Influence of priors

| Outcome                                       | Isometric strength   | Dynamic strength     |
|-----------------------------------------------|----------------------|----------------------|
| Bias different specification variance (Group) | Gamma(25,1)<br>-2.7% | Gamma(25,1)<br>-2.0% |
| Bias after non-informative priors (Group)     | -25.5%               | -10.9%               |

## Power and endurance

### 2) Lower body muscle power and strength endurance

Lower body muscle power was assessed via the vertical jump test performed via a countermovement with hands on hips attempting to jump as high as possible. Lower-body muscular strength-endurance was assessed by performing the leg extension exercise using 60% of the participant's initial body mass for as many repetitions as possible maintaining a constant cadence of 1-0-1-0 as monitored by a metronome.

### Individual data points

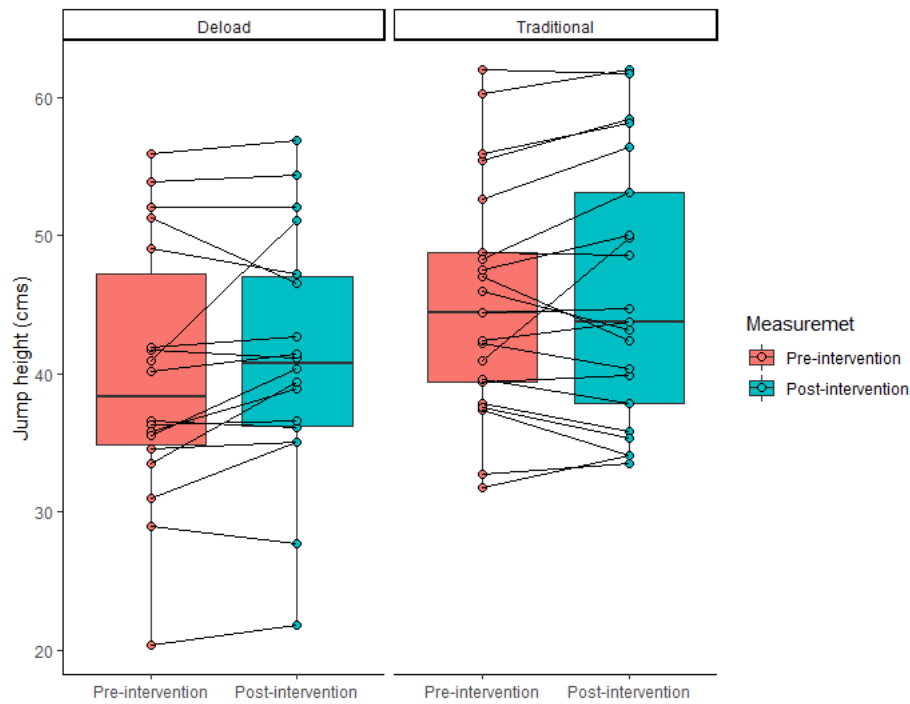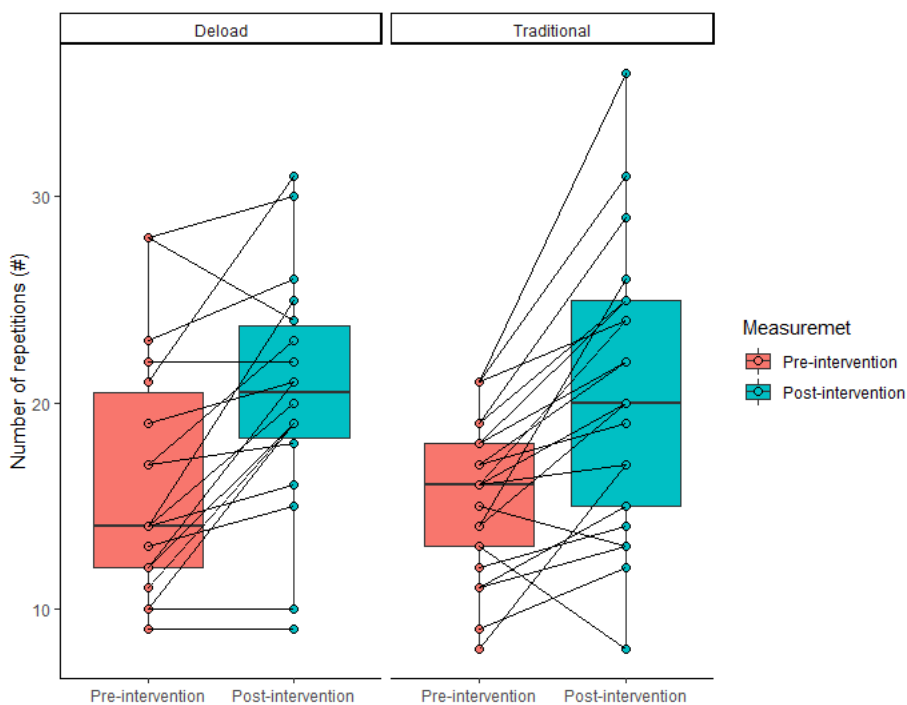

# WAMBS: Muscle power and strength endurance

## Understanding priors

| Outcome                | Muscle power                                                                      | Strength endurance                                                                 |
|------------------------|-----------------------------------------------------------------------------------|------------------------------------------------------------------------------------|
| Intercept              | Normal(18.4,1.6 <sup>2</sup> )                                                    | Normal(18.0,2.2 <sup>2</sup> )                                                     |
| Centered Pre Value     | Normal(0.85,2.0 <sup>2</sup> )                                                    | Normal(0.85,2.0 <sup>2</sup> )                                                     |
| Group                  | Normal(0,1.4 <sup>2</sup> )                                                       | Normal(0,2.0 <sup>2</sup> )                                                        |
| Prior predictive check | 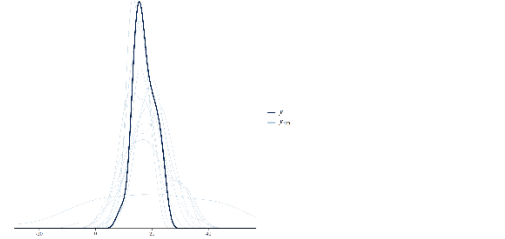 |  |

## Estimation

| Outcome                          | Muscle power                                                                        | Strength endurance                                                                   |
|----------------------------------|-------------------------------------------------------------------------------------|--------------------------------------------------------------------------------------|
| Rhat values                      | All equal 1.0                                                                       | All equal 1.0                                                                        |
| Bias doubling iterations (Group) | 1.8%                                                                                | -0.1%                                                                                |
| Posterior predictive check       | 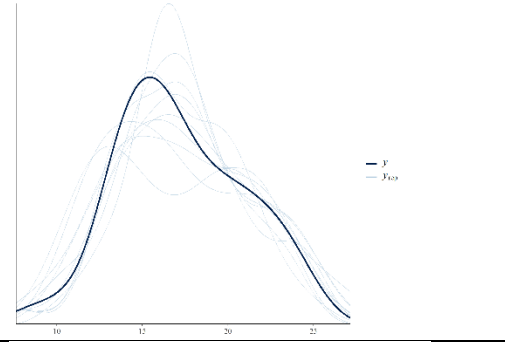  |   |
| Histogram and correlation        |  |  |
| Autocorrelation                  |  |  |

## Influence of priors

| Outcome                                       | Muscle power       | Strength endurance  |
|-----------------------------------------------|--------------------|---------------------|
| Bias different specification variance (Group) | Gamma(1,1)<br>3.0% | Gamma(5,1)<br>-4.8% |

|                                           |       |       |
|-------------------------------------------|-------|-------|
| Bias after non-informative priors (Group) | -3.0% | -3.5% |
|-------------------------------------------|-------|-------|

**Performance within group effect size summary**

Bayesian standardized mean difference effect sizes were estimated accounting for uncertainty in mean change for each group and pre-intervention standard deviation.

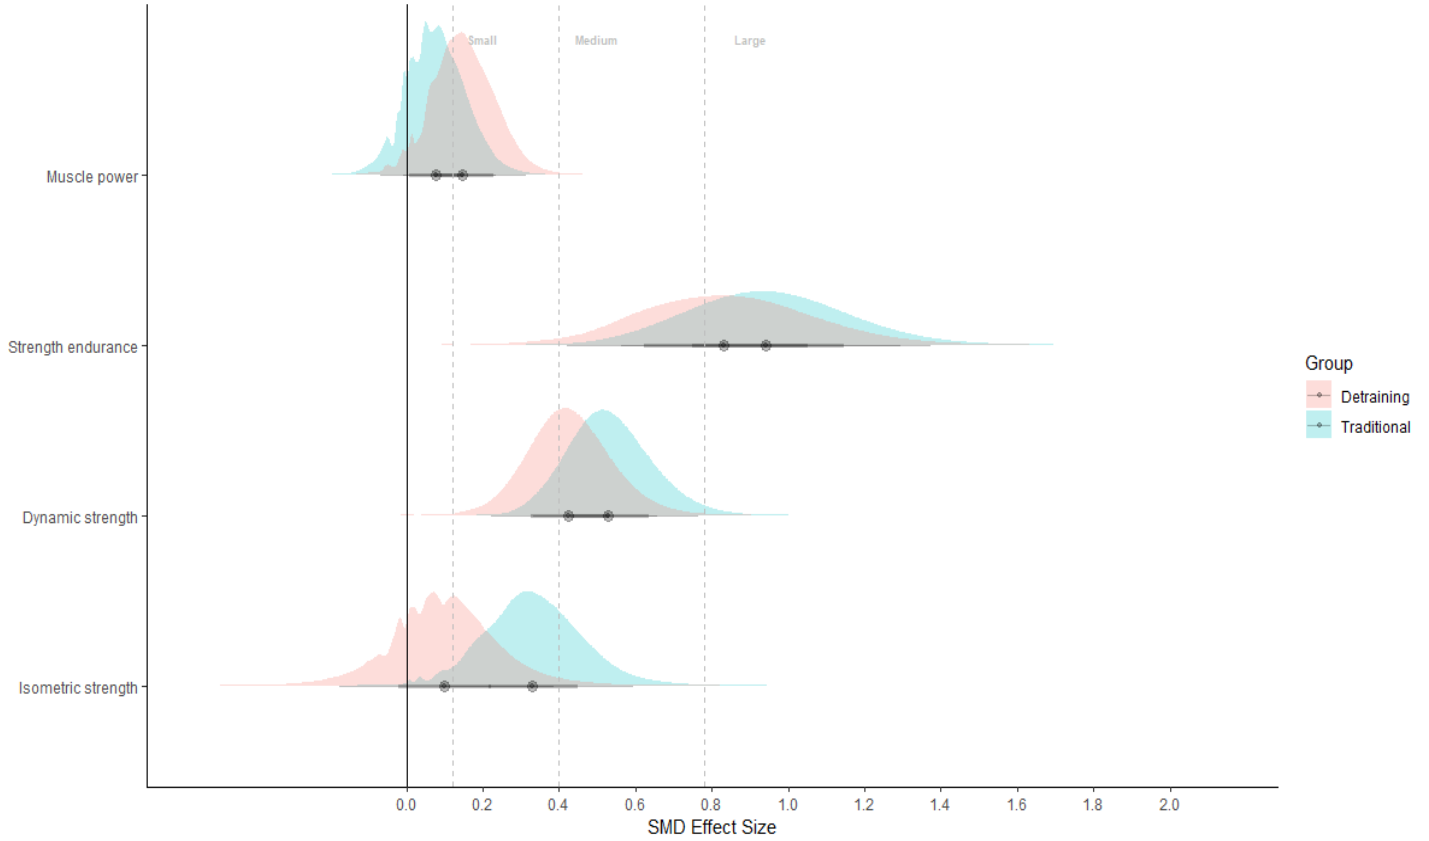

**Small (0.12), medium (0.40) and large (0.78) thresholds derived for strength and conditioning interventions are presented with gray lines.**



# Nutritional intake

Dietary adherence was assessed by self-reported 5-day food records (including at least 1 weekend day) pre- and post-intervention using MyFitnessPal.com and comprised total energy consumption, as well as the amount of energy derived from proteins, fats, and carbohydrates. This section presents the individual data points and analyses to investigate potential changes across the intervention and between groups.

## Individual data points

### 1) Daily energy intake

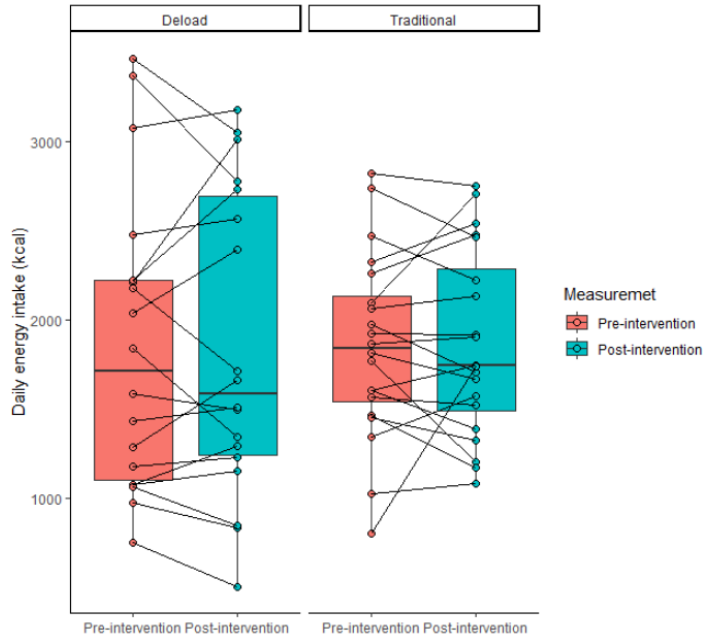

### 2) Carbohydrate intake

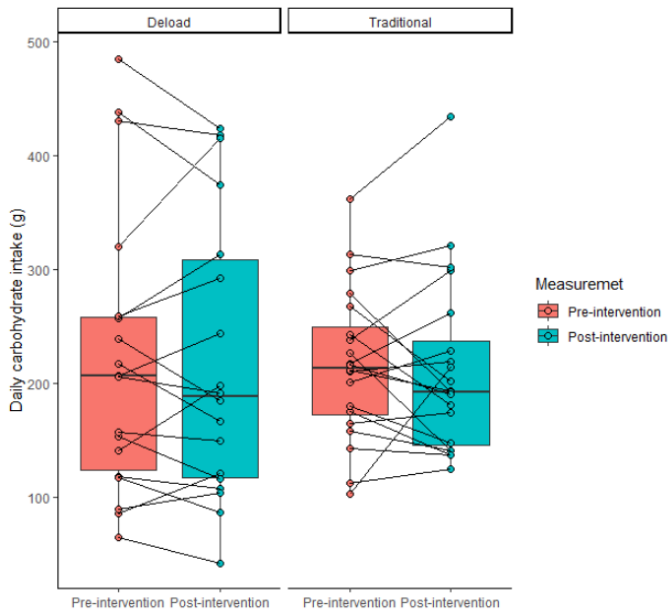

### 3) Fat intake

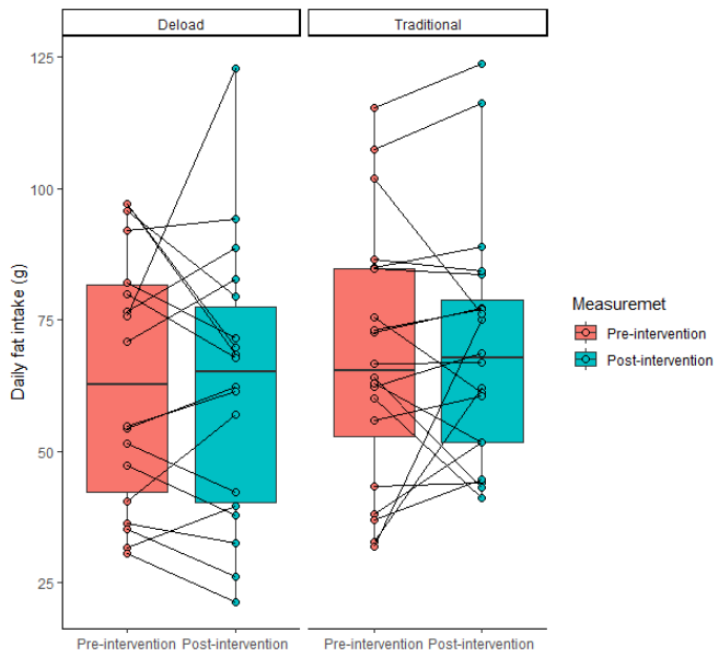

### 4) Protein intake

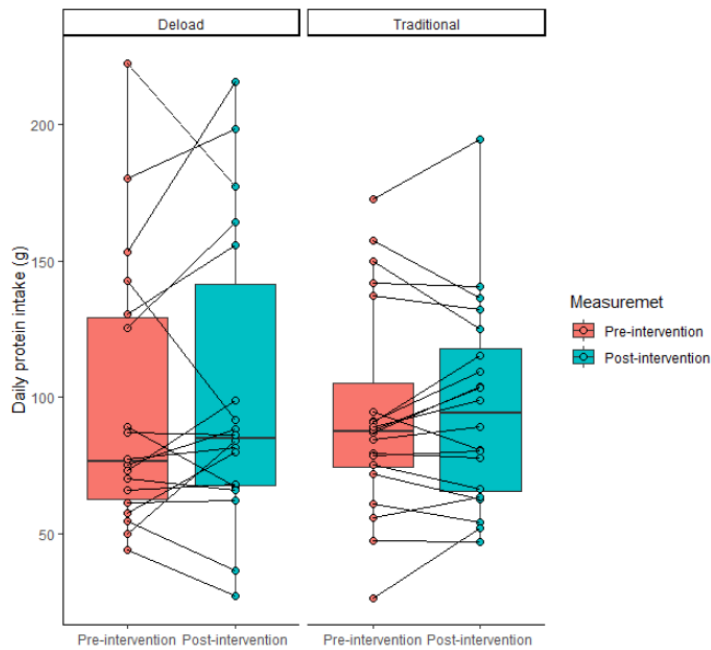

### 5) Assessment of potential differences

| Variable                   | Multilevel:<br>Time<br>Difference<br>[95%CrI] | Posterior<br>probability<br>increase post-<br>intervention | Multilevel:<br>Group<br>Difference<br>[95%CrI] | Posterior<br>probability<br>increase<br>deload | ANCOVA:<br>Group<br>Difference<br>[95%CrI] | Posterior<br>probability<br>increase<br>deload |
|----------------------------|-----------------------------------------------|------------------------------------------------------------|------------------------------------------------|------------------------------------------------|--------------------------------------------|------------------------------------------------|
| Total energy intake (kcal) | 7.4<br>[-105 to 120]                          | $p = 0.555$                                                | -26.1<br>[-475 to 470]                         | $p = 0.458$                                    | -16.3<br>[-248 to 206]                     | $p = 0.442$                                    |
| Carbohydrate intake (gs)   | -2.8<br>[-19.8 to 13.1]                       | $p = 0.357$                                                | 6.1<br>[-57.4 to 72.6]                         | $p = 0.579$                                    | 2.5<br>[-30.6 to 35.8]                     | $p = 0.559$                                    |
| Fat intake (gs)            | 0.41<br>[-5.2 to 6.1]                         | $p = 0.570$                                                | -5.7<br>[-21.6 to 9.9]                         | $p = 0.229$                                    | -4.3<br>[-14.9 to 6.5]                     | $p = 0.216$                                    |
| Protein intake (gs)        | 3.7<br>[-3.8 to 11.2]                         | $p = 0.851$                                                | 4.3<br>[-23.1 to 33.2]                         | $p = 0.623$                                    | 2.4<br>[-12.6 to 16.9]                     | $p = 0.621$                                    |

Time difference represents the estimated difference between pre- and post-intervention across both groups. Group difference represents the estimated difference between the deload and traditional group.

## Readiness to train

To assess participants' subjective feelings toward training across the study period a readiness-to-train questionnaire comprising 7 questions using Likert-type scales ranging from 1 to 4, 1 to 5 and 1 to 10 was given to participants 24-48 hours after the fourth and ninth weeks of the study. The upper and lower limit were anchored by the following sentence: "1 can be described as not at all/extremely low and 4, 5, 10 (depending on lower/upper end of the scale) can be described as extreme amount/extremely high."

### Individual data points

- 1) Do you feel physically strong today? (Likert: 1 to 5)

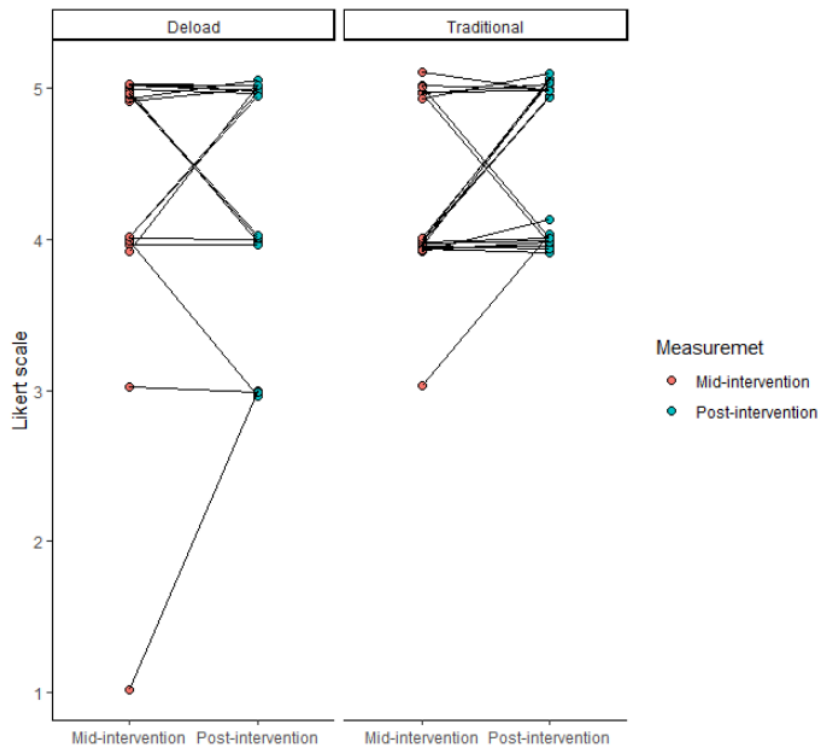

- 2) Do you feel mentally strong today? (Likert: 1 to 5)

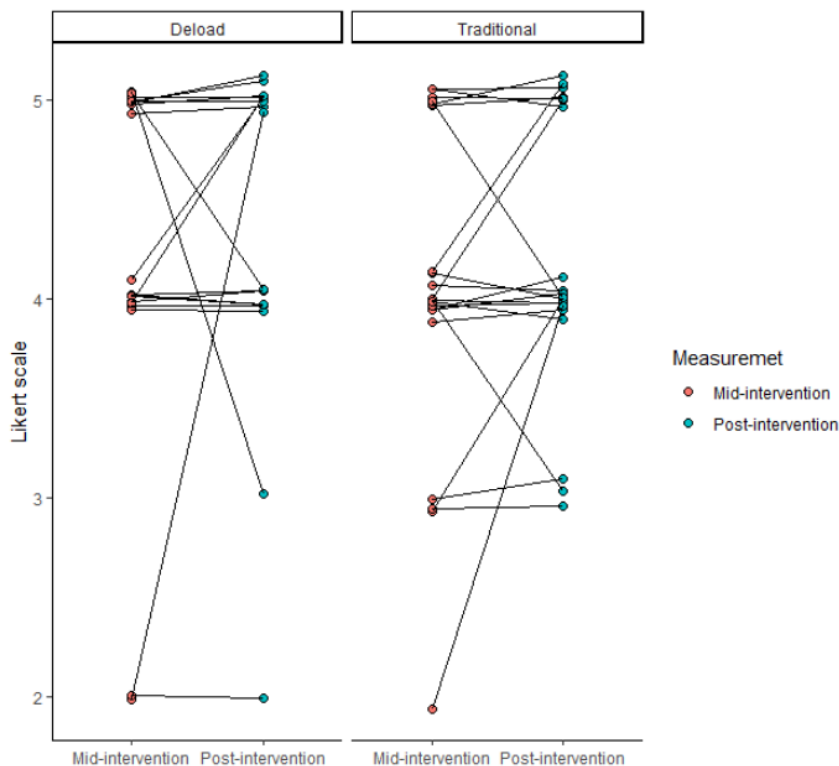

3) How would you describe your health today? (Likert: 1 to 4)

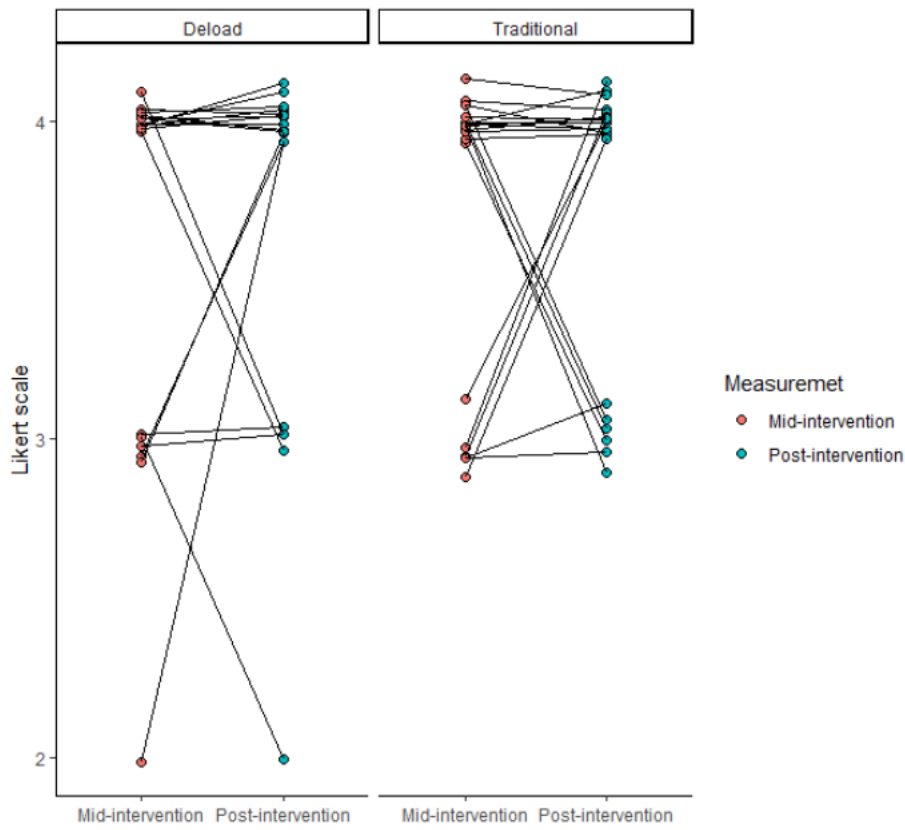

4) How would you describe your appetite today? (Likert: 1 to 5)

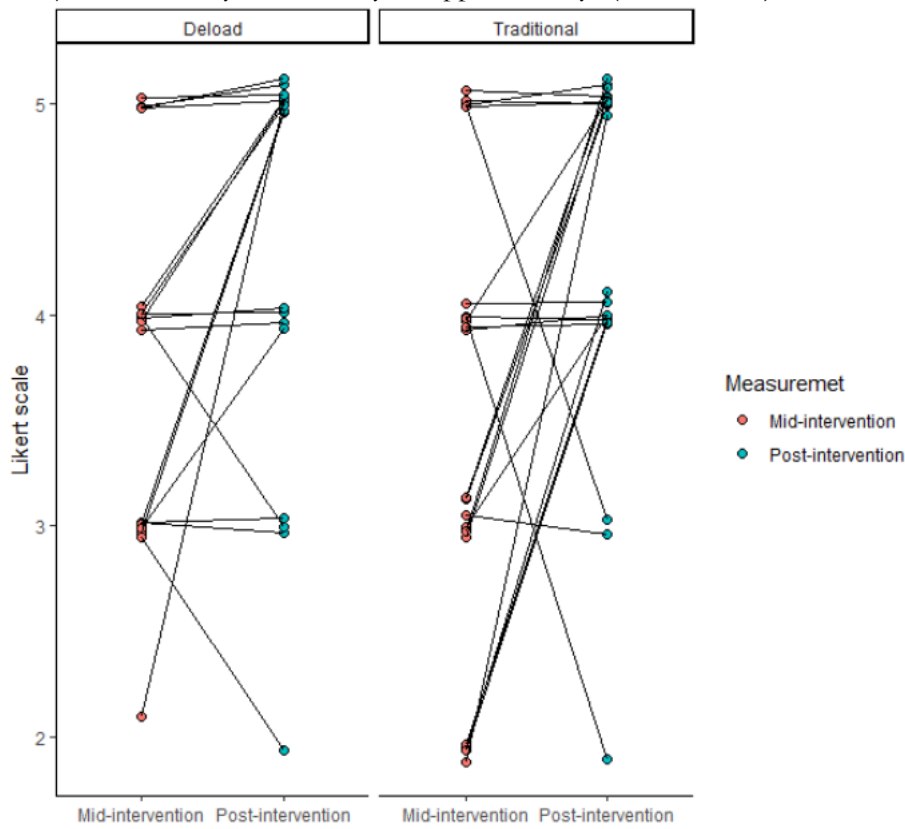

5) How would you describe your sleep quality over the last 24H? (Likert: 1 to 4)

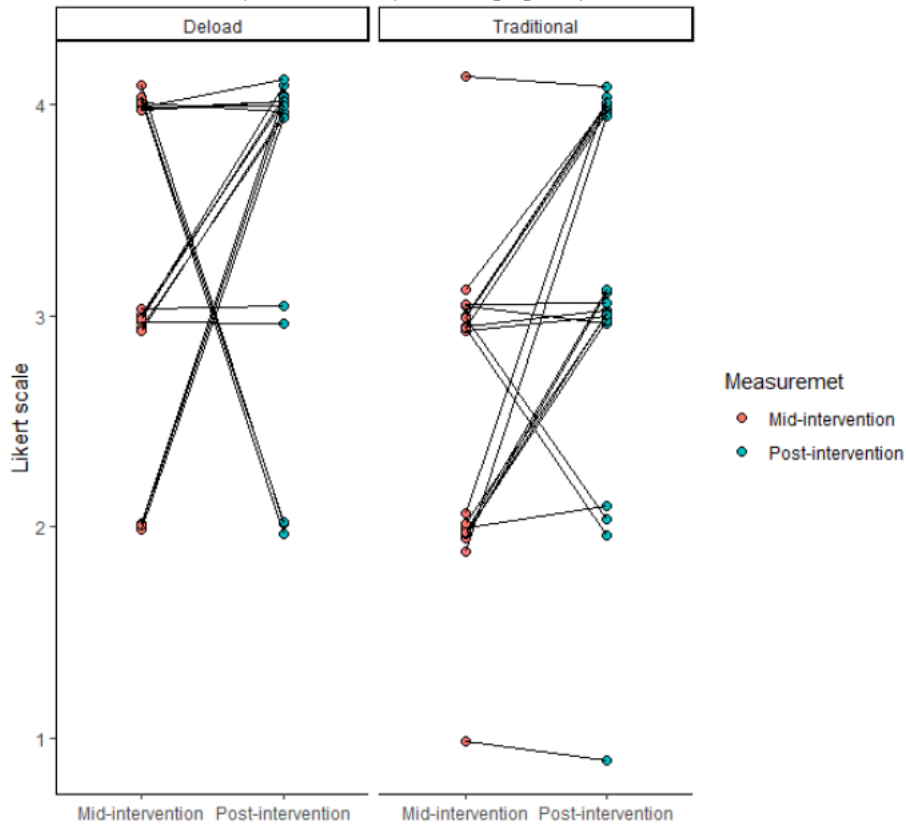

6) Do you have any muscle soreness today? (Likert: 1 to 10)

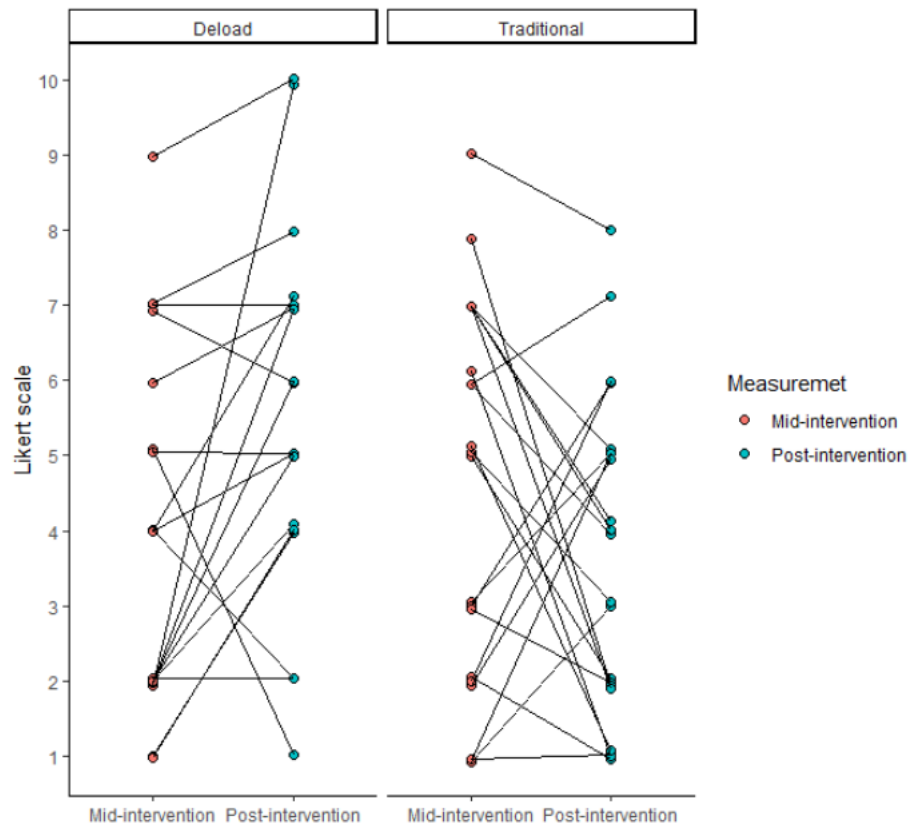

7) Rate your motivation to train today. (Likert: 1 to 10)

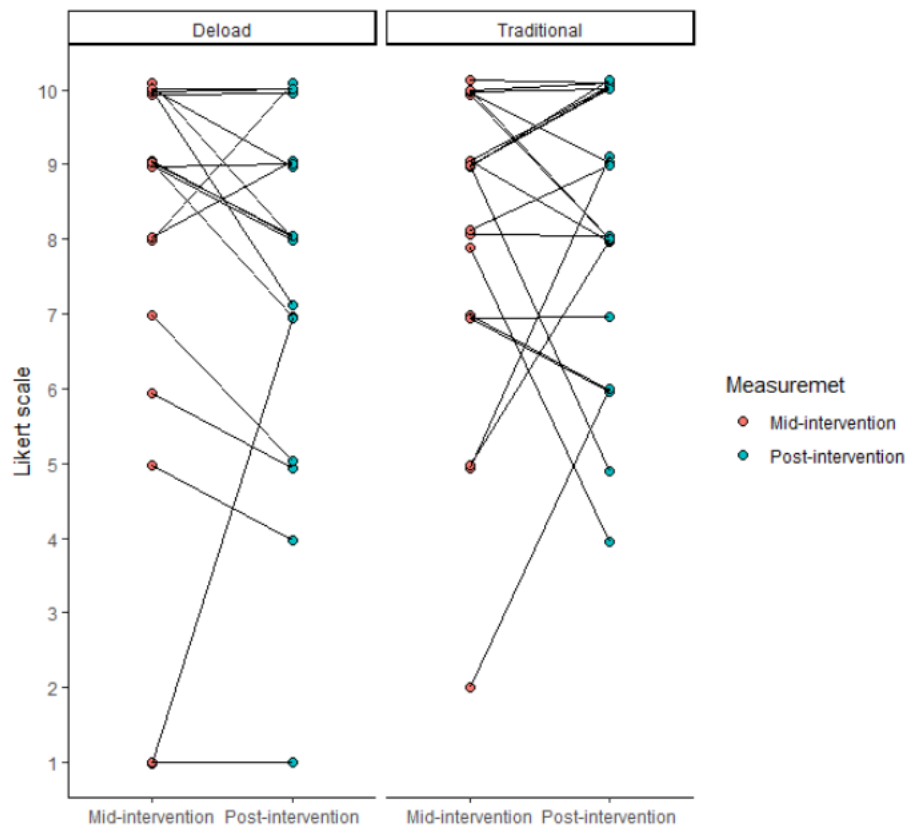

8) Assessment of potential differences

| Variable               | Mid-intervention: Group Difference [95%CrI] | Posterior probability increase deload | Post-intervention: Group Difference [95%CrI] | Posterior probability increase deload | ANCOVA: Group Difference [95%CrI] | Posterior probability increase deload |
|------------------------|---------------------------------------------|---------------------------------------|----------------------------------------------|---------------------------------------|-----------------------------------|---------------------------------------|
| Feel physically strong | 0.04<br>[-0.49 to 0.60]                     | $p = 0.567$                           | -0.13<br>[-0.58 to 0.33]                     | $p = 0.261$                           | -0.15<br>[-0.52 to 0.23]          | $p = 0.209$                           |
| Feel mentally strong   | 0.18<br>[-0.39 to 0.77]                     | $p = 0.727$                           | 0.15<br>[-0.36 to 0.64]                      | $p = 0.616$                           | 0.07<br>[-0.38 to 0.52]           | $p = 0.623$                           |
| Describe your health   | -0.11<br>[-0.46 to 0.25]                    | $p = 0.279$                           | -0.05<br>[-0.40 to 0.29]                     | $p = 0.387$                           | -0.03<br>[-0.37 to 0.31]          | $p = 0.440$                           |
| Describe your appetite | 0.21<br>[-0.47 to 0.89]                     | $p = 0.740$                           | -0.01<br>[-0.60 to 0.58]                     | $p = 0.488$                           | -0.04<br>[-0.61 to 0.55]          | $p = 0.440$                           |
| Sleep quality last 24H | 0.70<br>[0.23 to 1.2]                       | $p = 0.999$                           | 0.42<br>[-0.13 to 0.97]                      | $p = 0.938$                           | 0.36<br>[-0.28 to 0.97]           | $p = 0.976$                           |
| Muscle soreness        | -0.58<br>[-2.2 to 1.0]                      | $p = 0.244$                           | 1.9<br>[0.37 to 3.4]                         | $p = 0.992$                           | 2.0<br>[0.53 to 3.5]              | $p = 0.995$                           |
| Motivation to train    | -0.30<br>[-1.9 to 1.3]                      | $p = 0.459$                           | -0.65<br>[-2.0 to 0.76]                      | $p = 0.169$                           | -0.50<br>[-1.6 to 0.66]           | $p = 0.193$                           |

Group difference represents the estimated difference between the deload and traditional group (deload:traditional).
